# Supplementary material
Source: Springer Nature journal article supplement (https://www.springermedizin.de/resource/supplementary/12881_2013_1167_MOESM5_ESM.pdf/9452190)

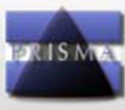

# PRISMA 2009 Flow Diagram

Identification

Screening

Eligibility

Included

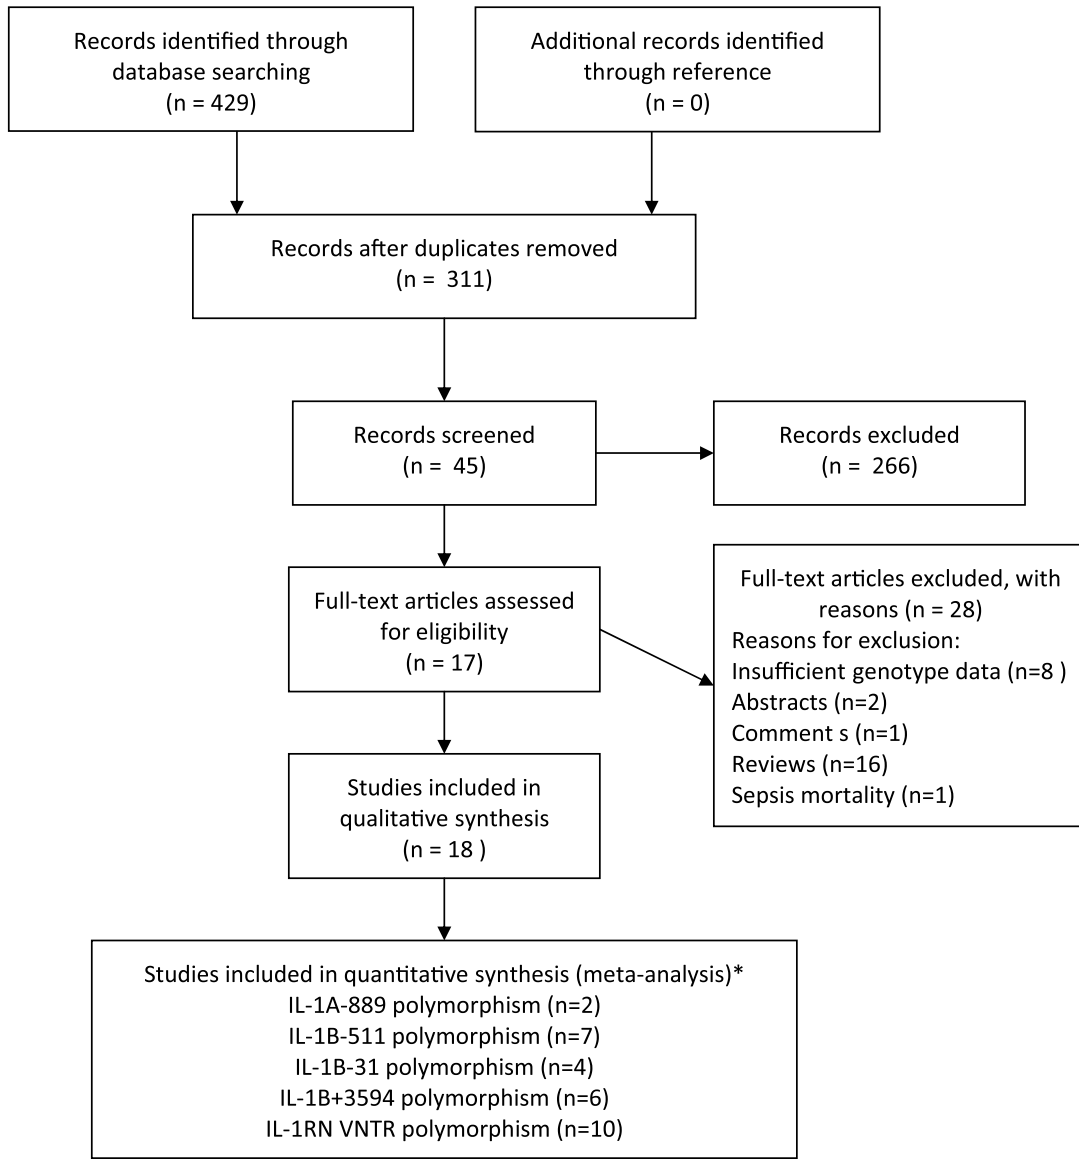

Supplement: MOESM5 [file 9452190]
